# Supplementary material for: Effects of p21 on adult hippocampal neuronal development after irradiation
Source: PubMed Central journal article supplement (PMC6131552; doi:10.1038/s41420-018-0081-2), 2018-07-18
Supplement: 41420_2018_81_MOESM1_ESM.pdf [file 41420_2018_81_MOESM1_ESM.pdf]

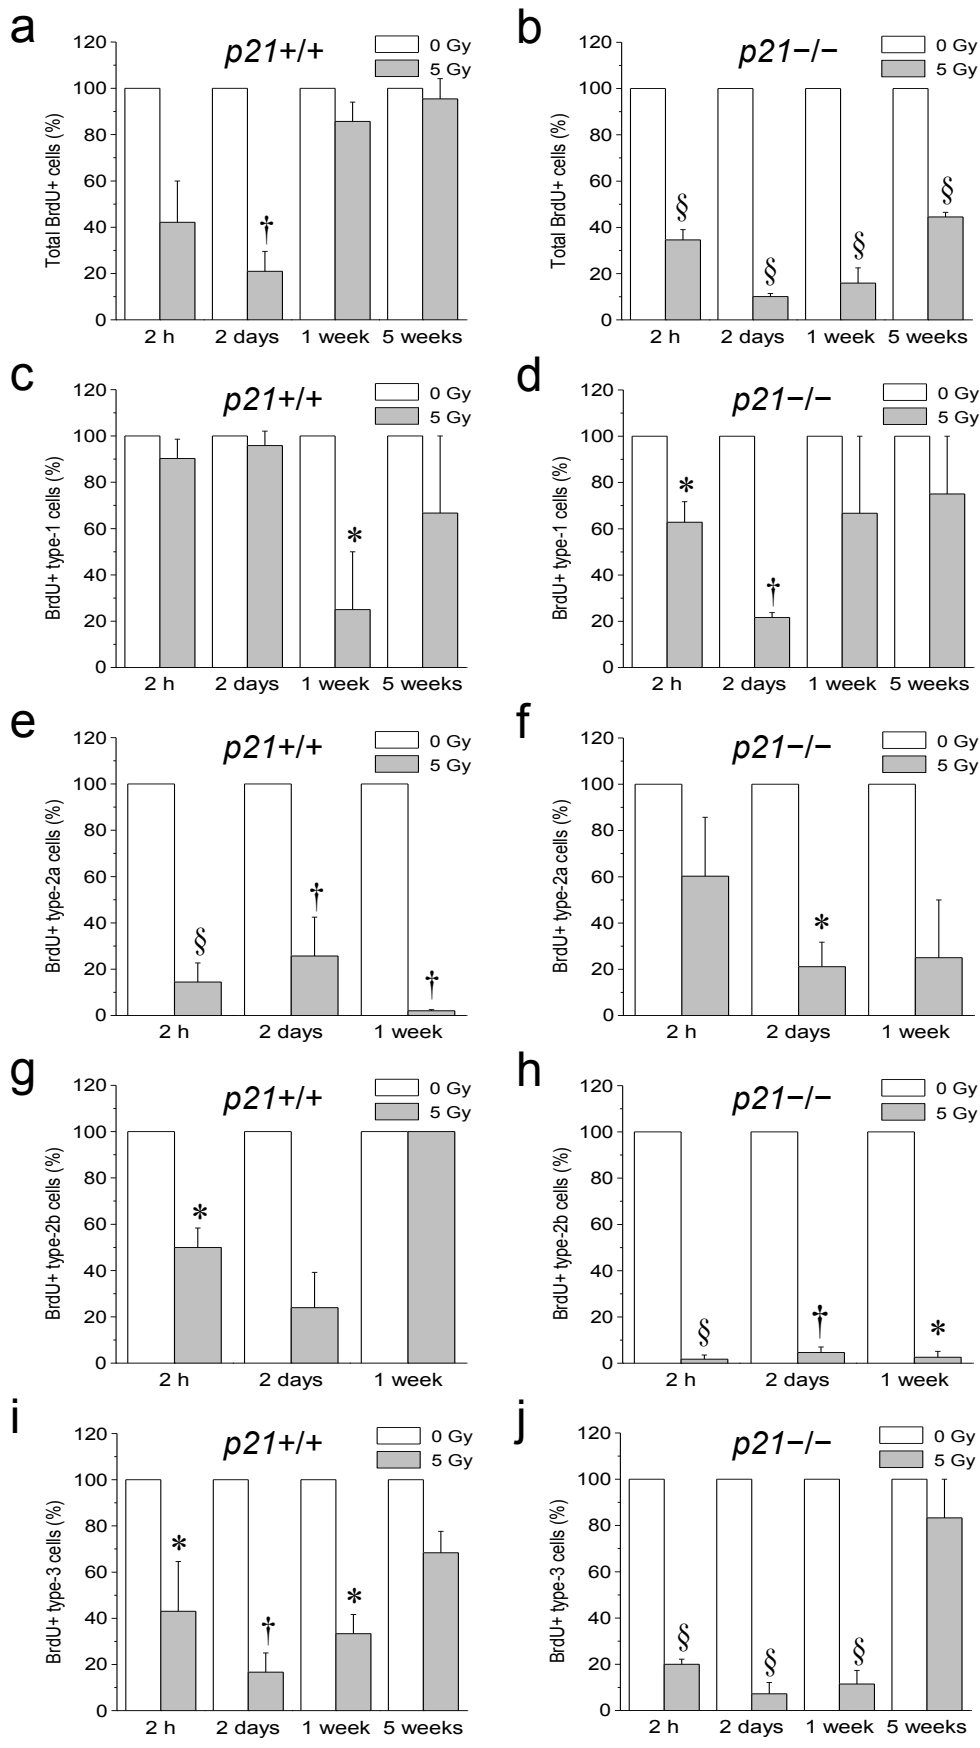

Supplementary Fig. 1
